# Supplementary material for: Excellent Interrater Reliability for Manual Segmentation of the Medial Perirhinal Cortex
Source: MDPI journal article supplement (doi:10.3390/brainsci13060850), 2023-05-24
Supplement: s1 [file s1]

## Supplementary materials

The following **Figures S1-8** visualize the borders of mPRC, IPRC, and ERC in coronal slices using FreeSurfer in one random participant. **A:** How to find the **anterior border** of the left hemisphere (**Figures S1-4**). Yellow line represents white matter surface and red line represents pial surface as generated by FreeSurfer. *Note: 1slice is equal to 1mm.*

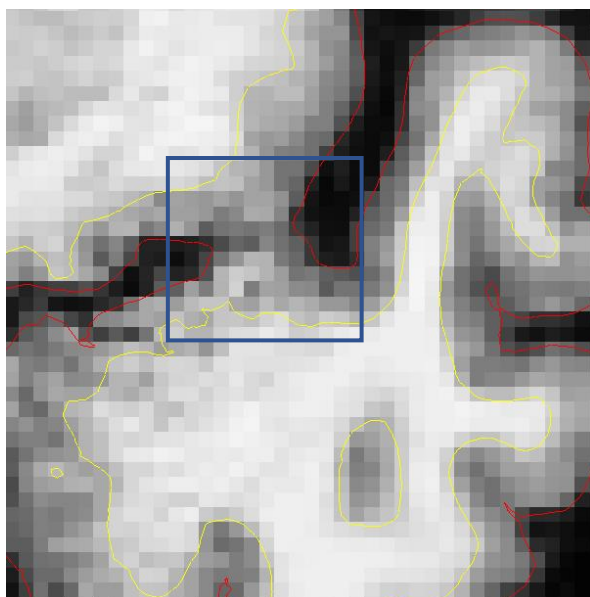

**Figure S1.** Anterior border +3slices: Last slice, where the white matter of the limen insulae is not visible (blue mark).

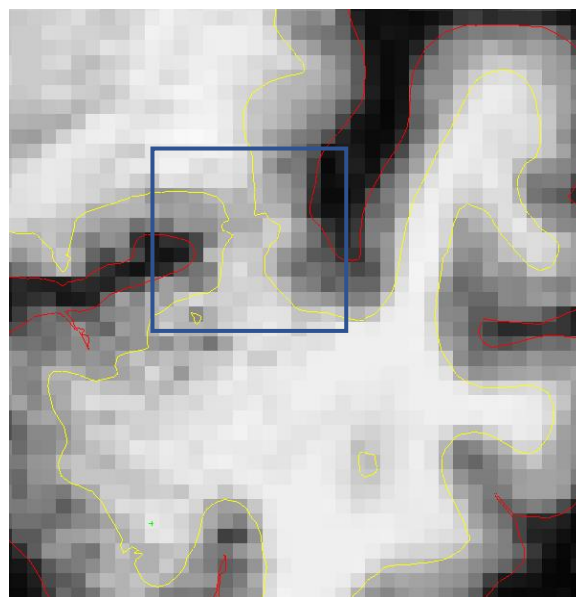

**Figure S2.** Anterior border +2slices: First slice, where the white matter of the limen insulae is visible (blue mark).

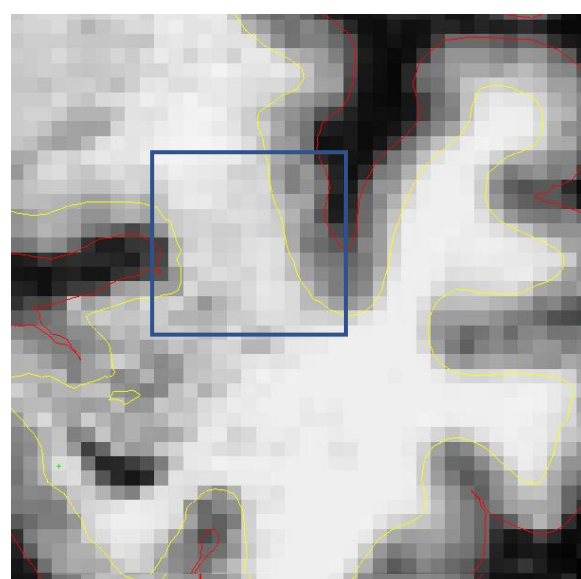

**Figure S3.** Anterior border: 2slices posterior to the first slice, where the white matter of the limen insulae is visible.

| Structure   | Anterior border                                                                                                                                                |
|-------------|----------------------------------------------------------------------------------------------------------------------------------------------------------------|
| ERC         | 2 mm posterior to the first anterior slice where the white matter of the limen insulae is visible.                                                             |
| Medial PRC  | Same coronal level as the anterior border of the ERC, i.e., 2 mm posterior to the first anterior slice where the white matter of the limen insulae is visible. |
| Lateral PRC | Same coronal level as the anterior border of the ERC, i.e., 2 mm posterior to the first anterior slice where the white matter of the limen insulae is visible. |

**Figure S4.** Anterior border: Adapted and modified from Krumm et al. (2016).

**B: How to find the posterior border of the left hemisphere (Figures S5-8).**

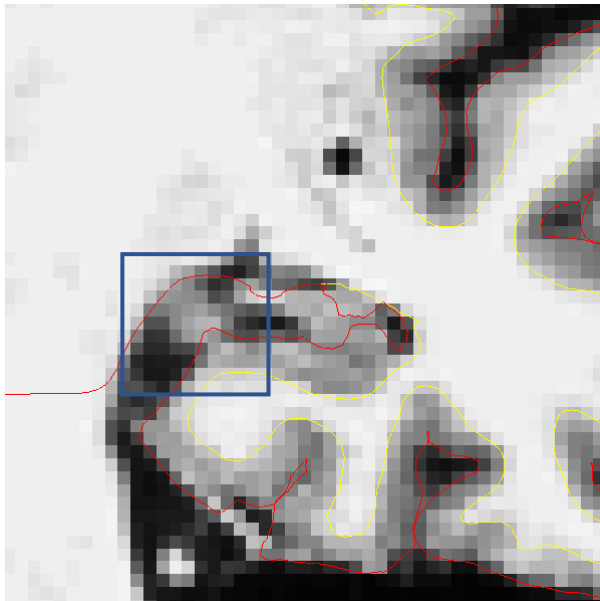

**Figure S5.** Posterior border +2slices: Apex of the intralimbic gyrus is still visible (blue mark).

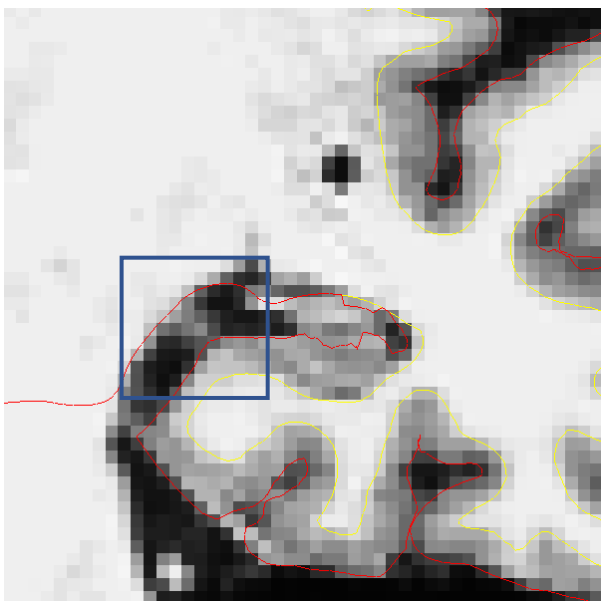

**Figure S6.** Posterior border +1slice: Last slice still containing the apex of the intralimbic gyrus (blue mark).

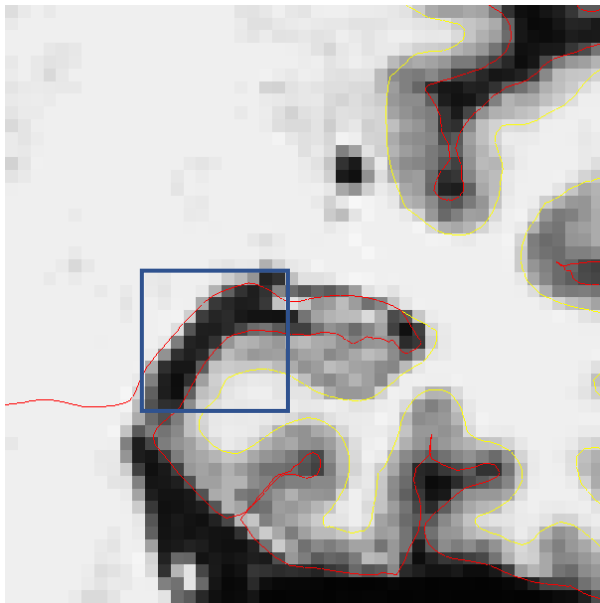

**Figure S7.** Posterior border: 1slice posterior to the last slice still containing the apex of the intralimbic gyrus (blue mark).

| Structure   | Posterior border                                                                     |
|-------------|--------------------------------------------------------------------------------------|
| ERC         | 1 mm posterior to the last slice still containing the apex of the intralimbic gyrus. |
| Medial PRC  | 1 mm posterior to the last slice still containing the apex of the intralimbic gyrus. |
| Lateral PRC | 1 mm posterior to the last slice still containing the apex of the intralimbic gyrus. |

**Figure S8.** Posterior border: Adapted and modified from Krumm et al. (2016).
